# Supplementary material
Source: PubMed Central journal article supplement (PMC7305027)

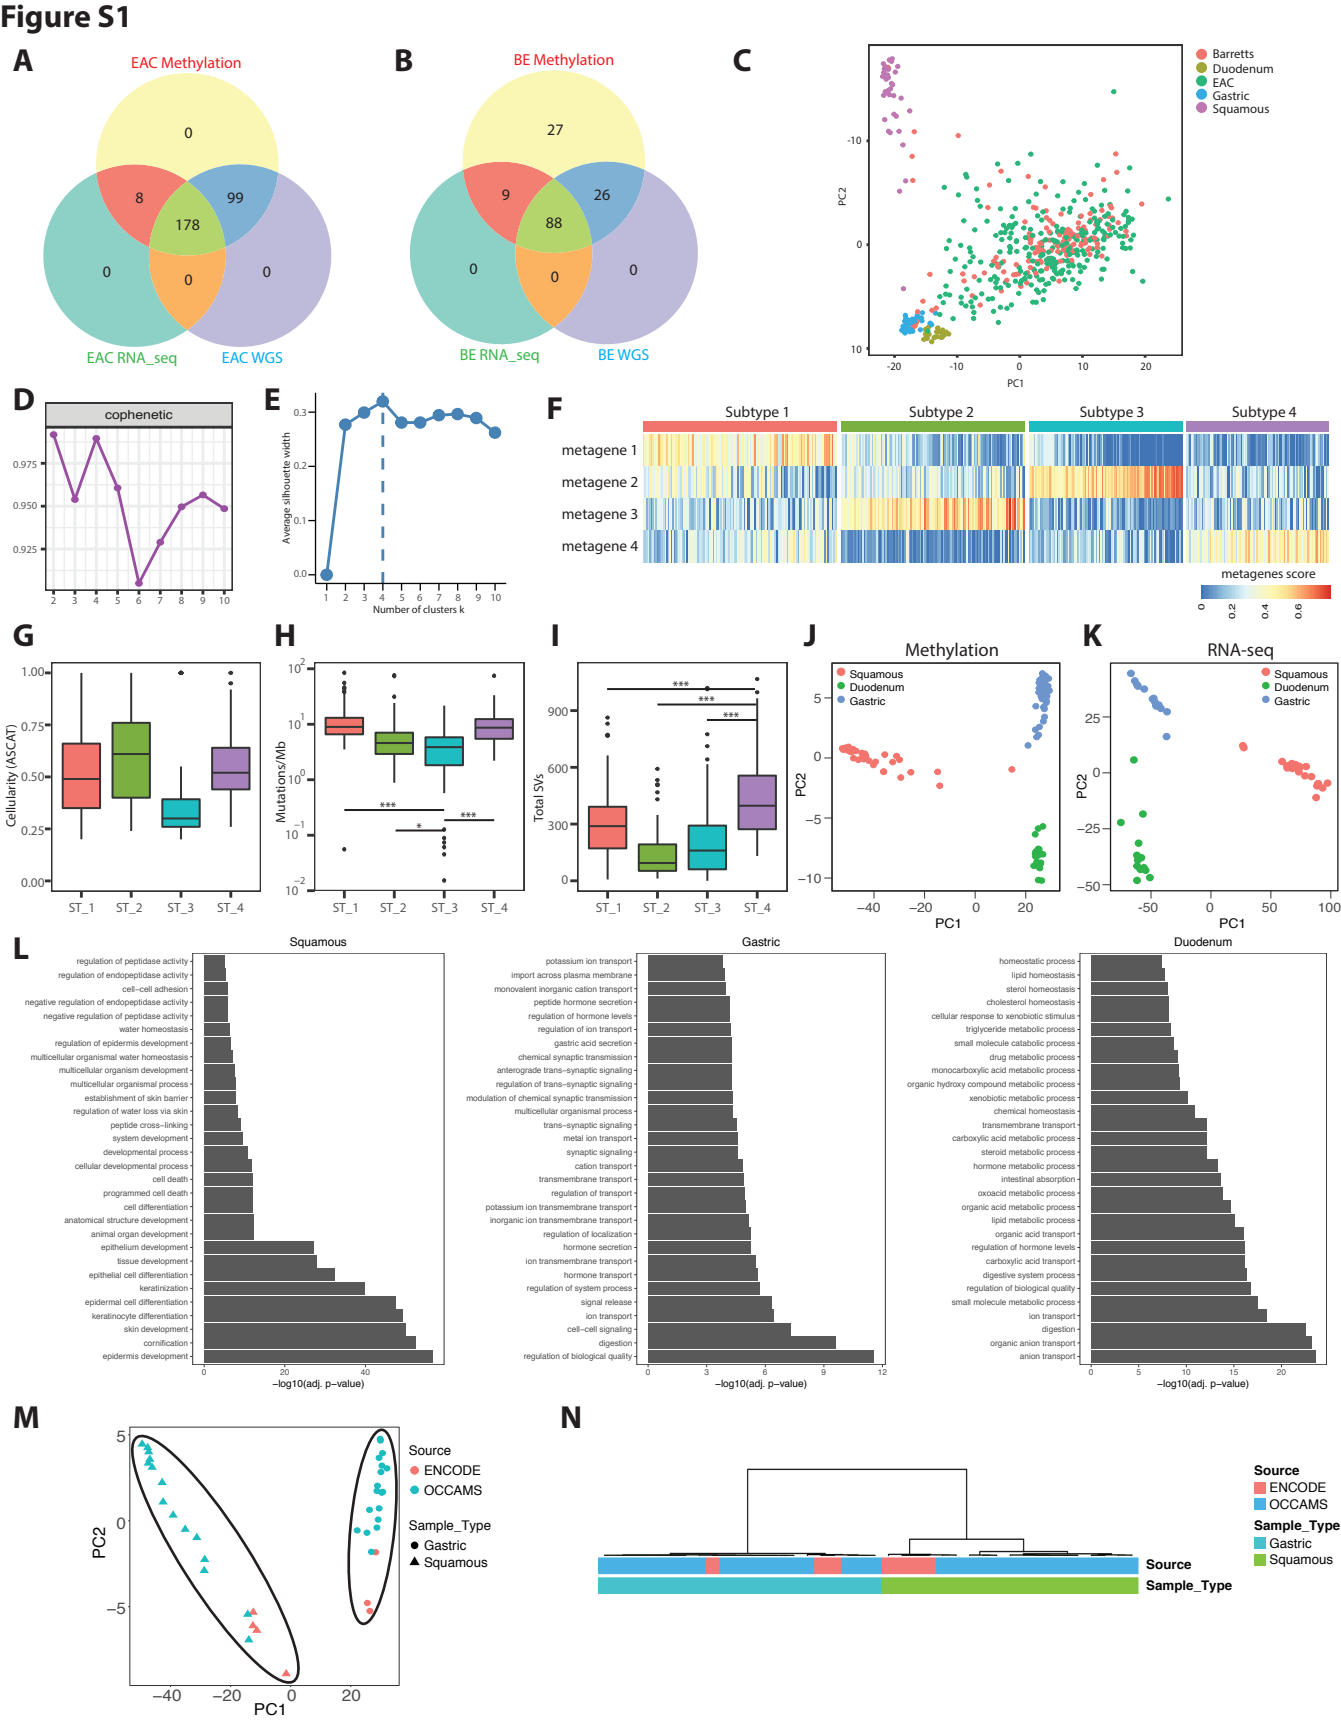

**Figure S2**

**A**

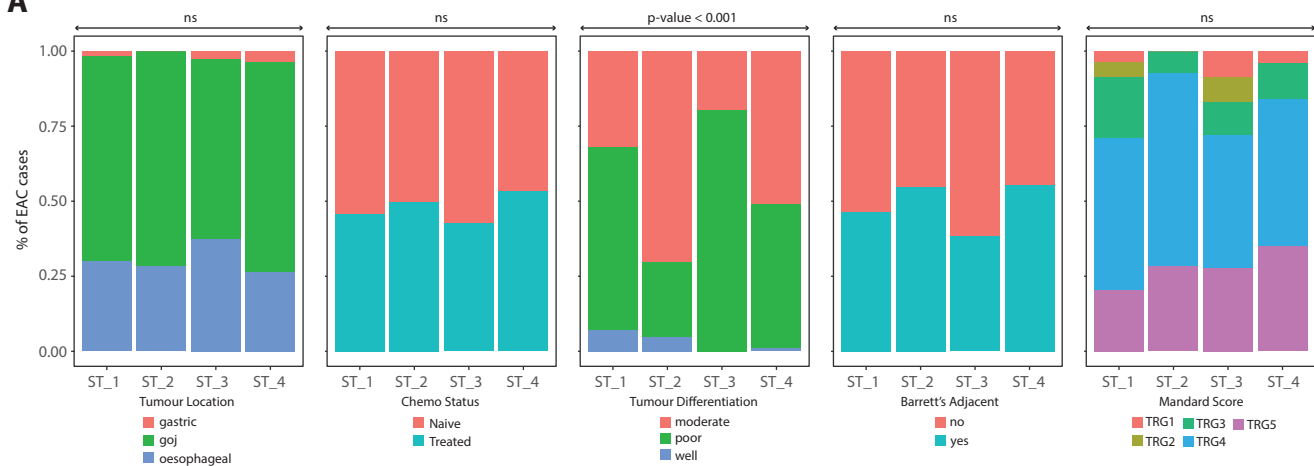

**B**

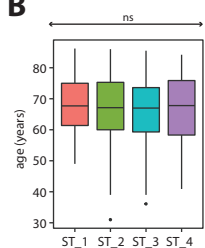

**C**

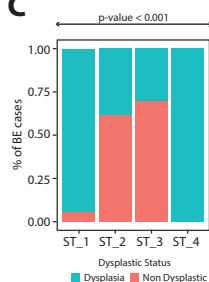

**D**

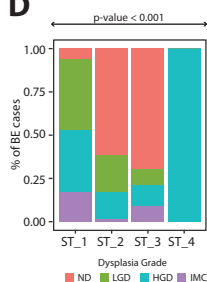

**E**

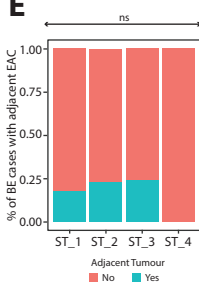

**F**

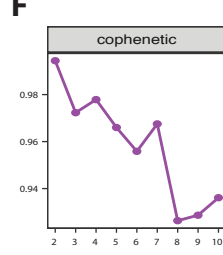

**G**

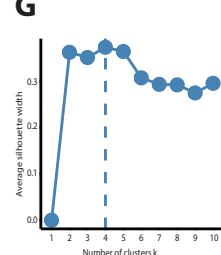

**H**

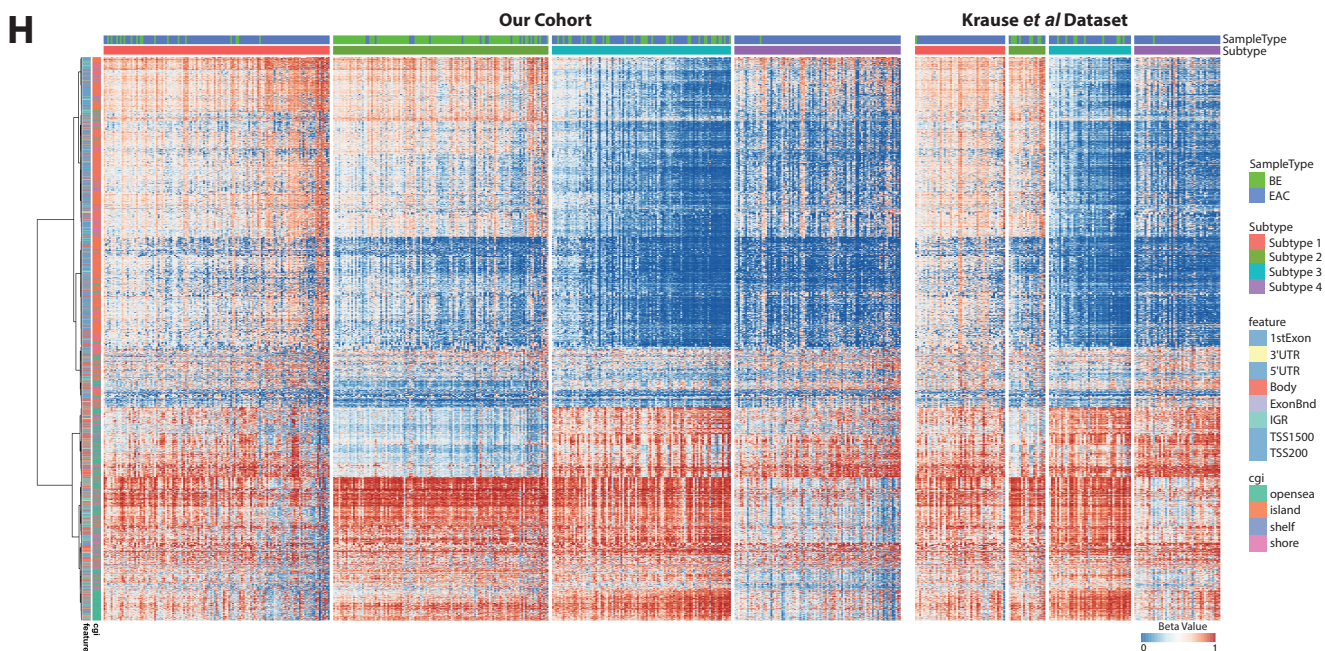

Figure S3

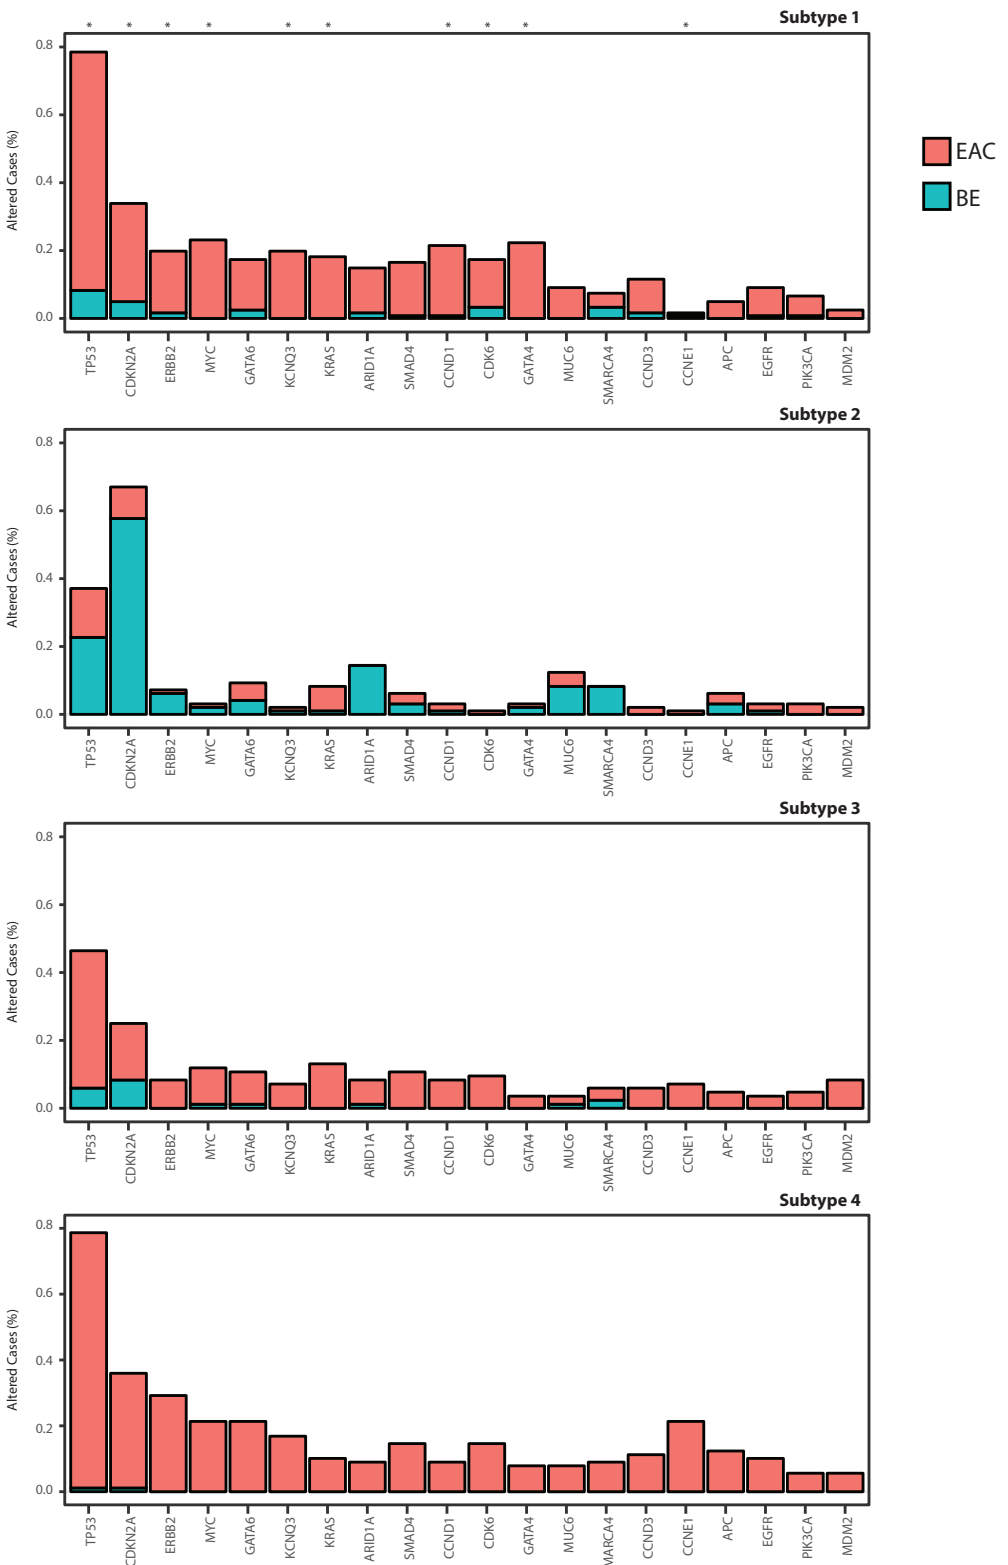

Figure S4

**HNF4A**

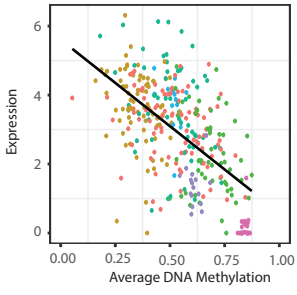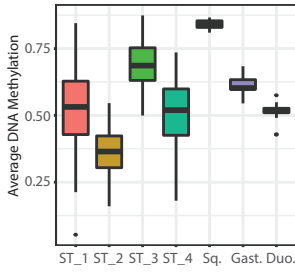

**HNF4G**

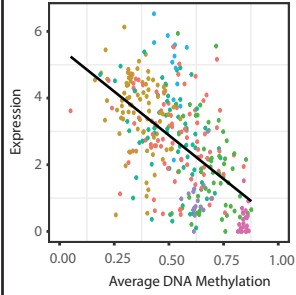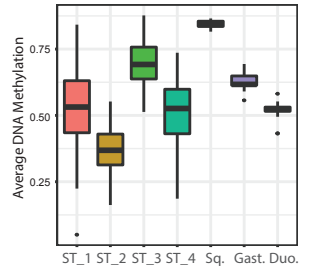

**FOXA3**

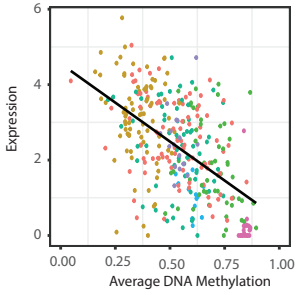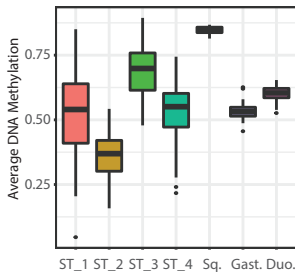

**GATA6**

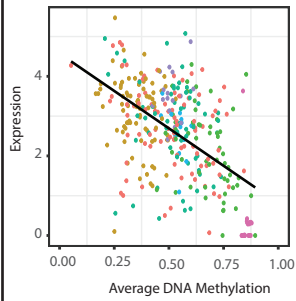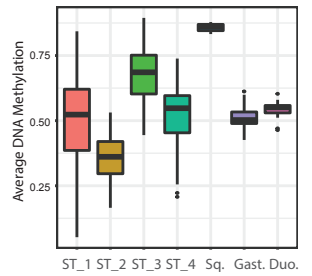

**CDX2**

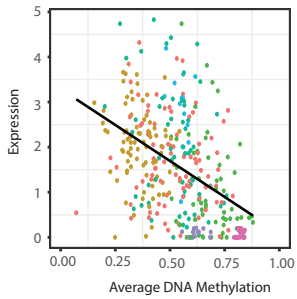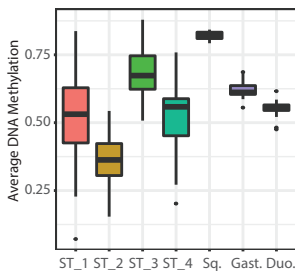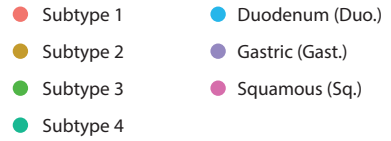

**Figure S5**

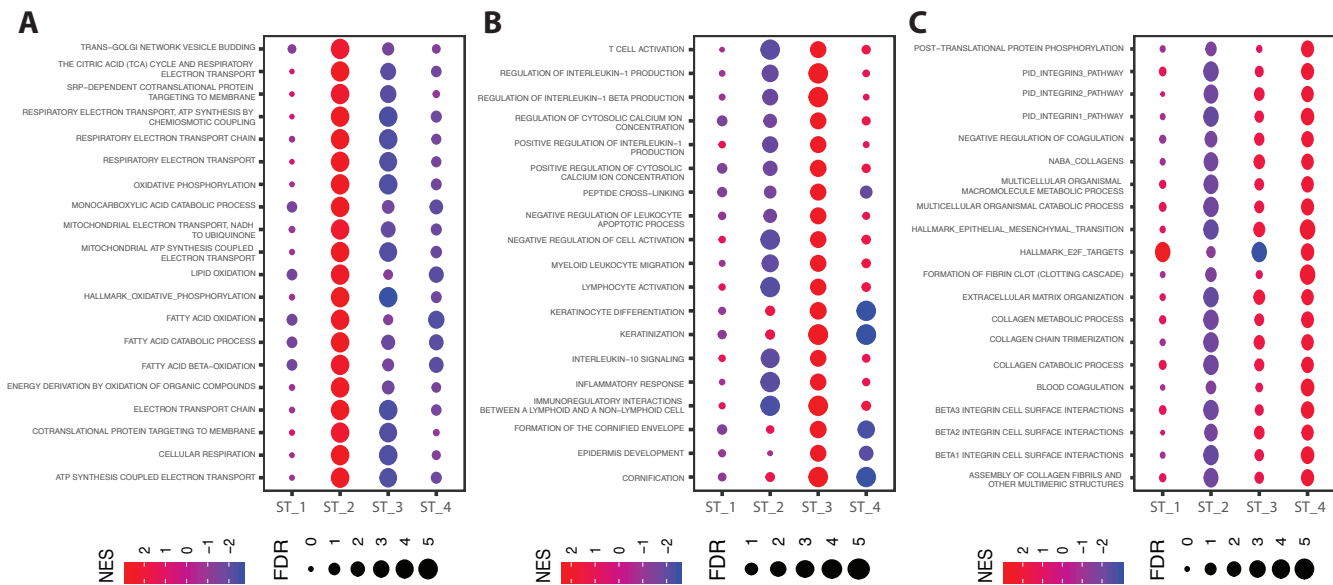

**D**

Subtype 1

Subtype 2

Subtype 3

Subtype 4

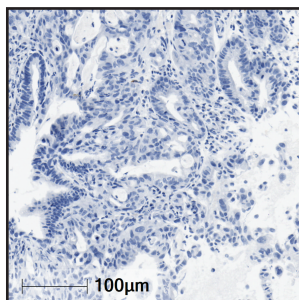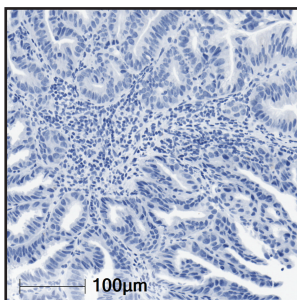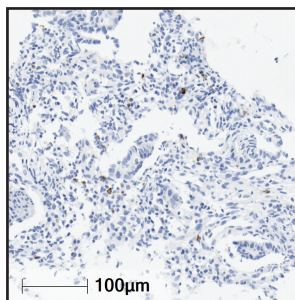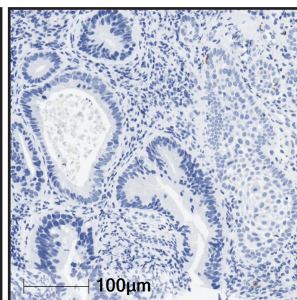

Granzyme B

100µm

100µm

100µm

100µm

**Figure S6**

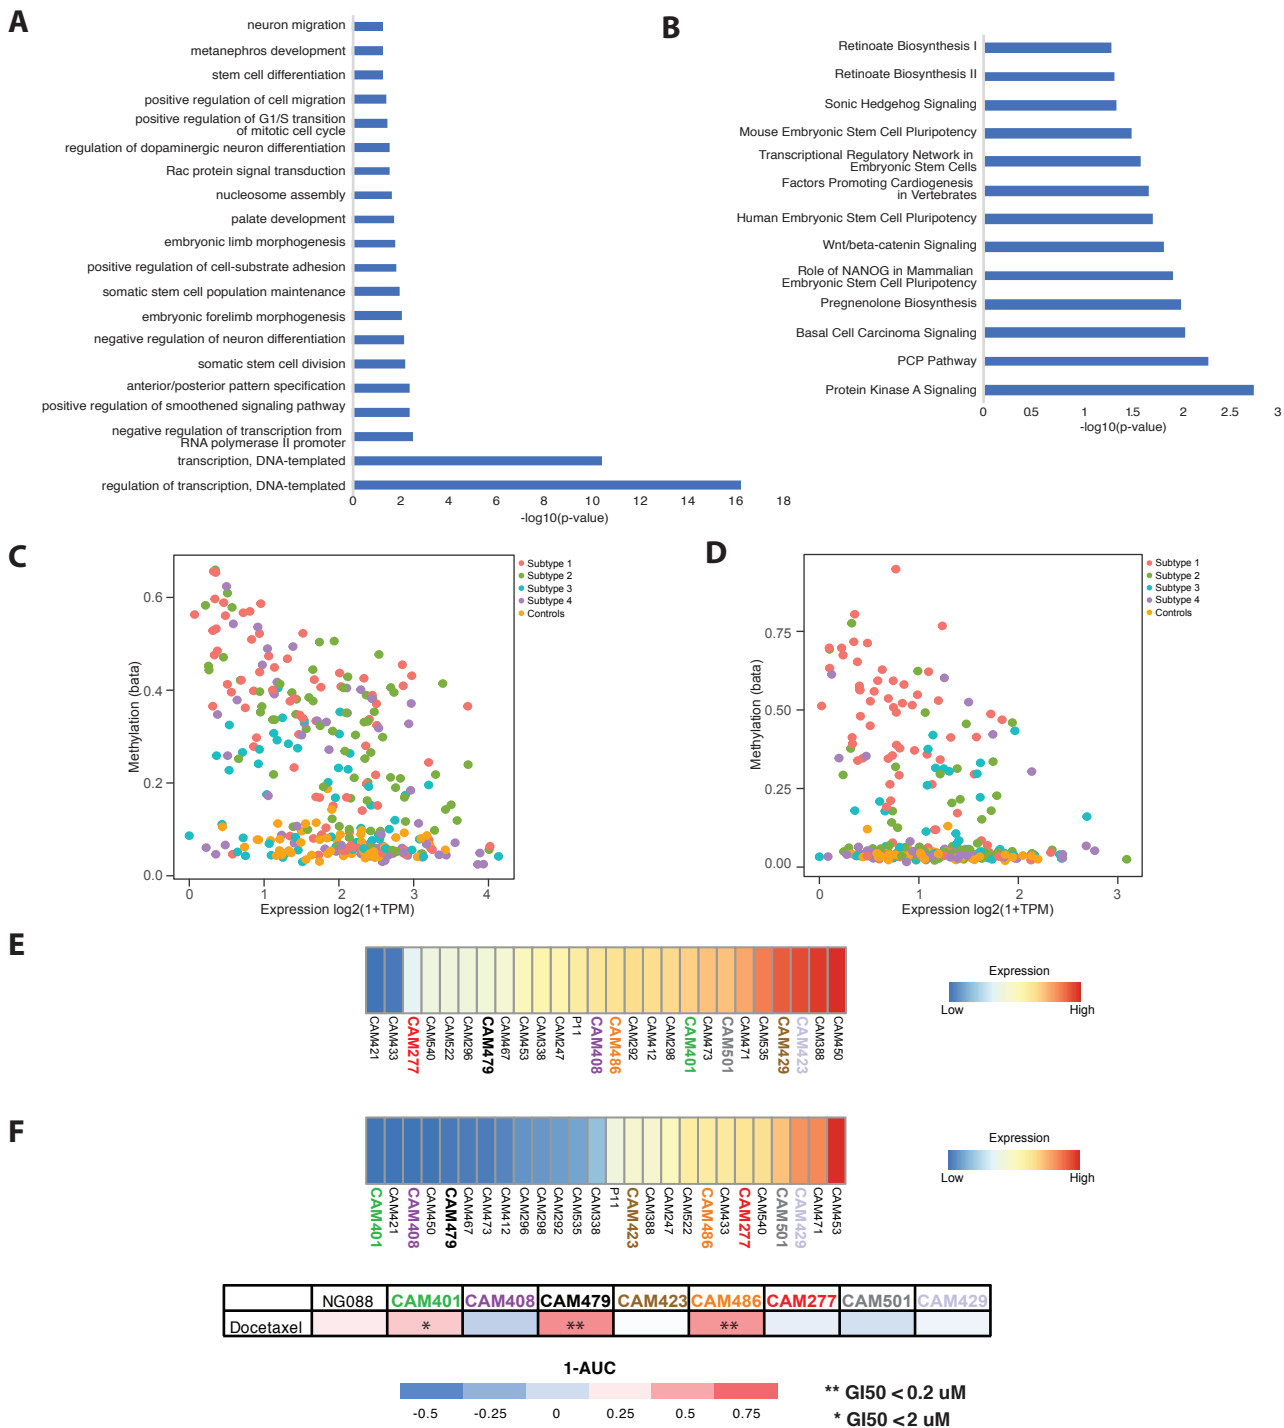

**Figure S7**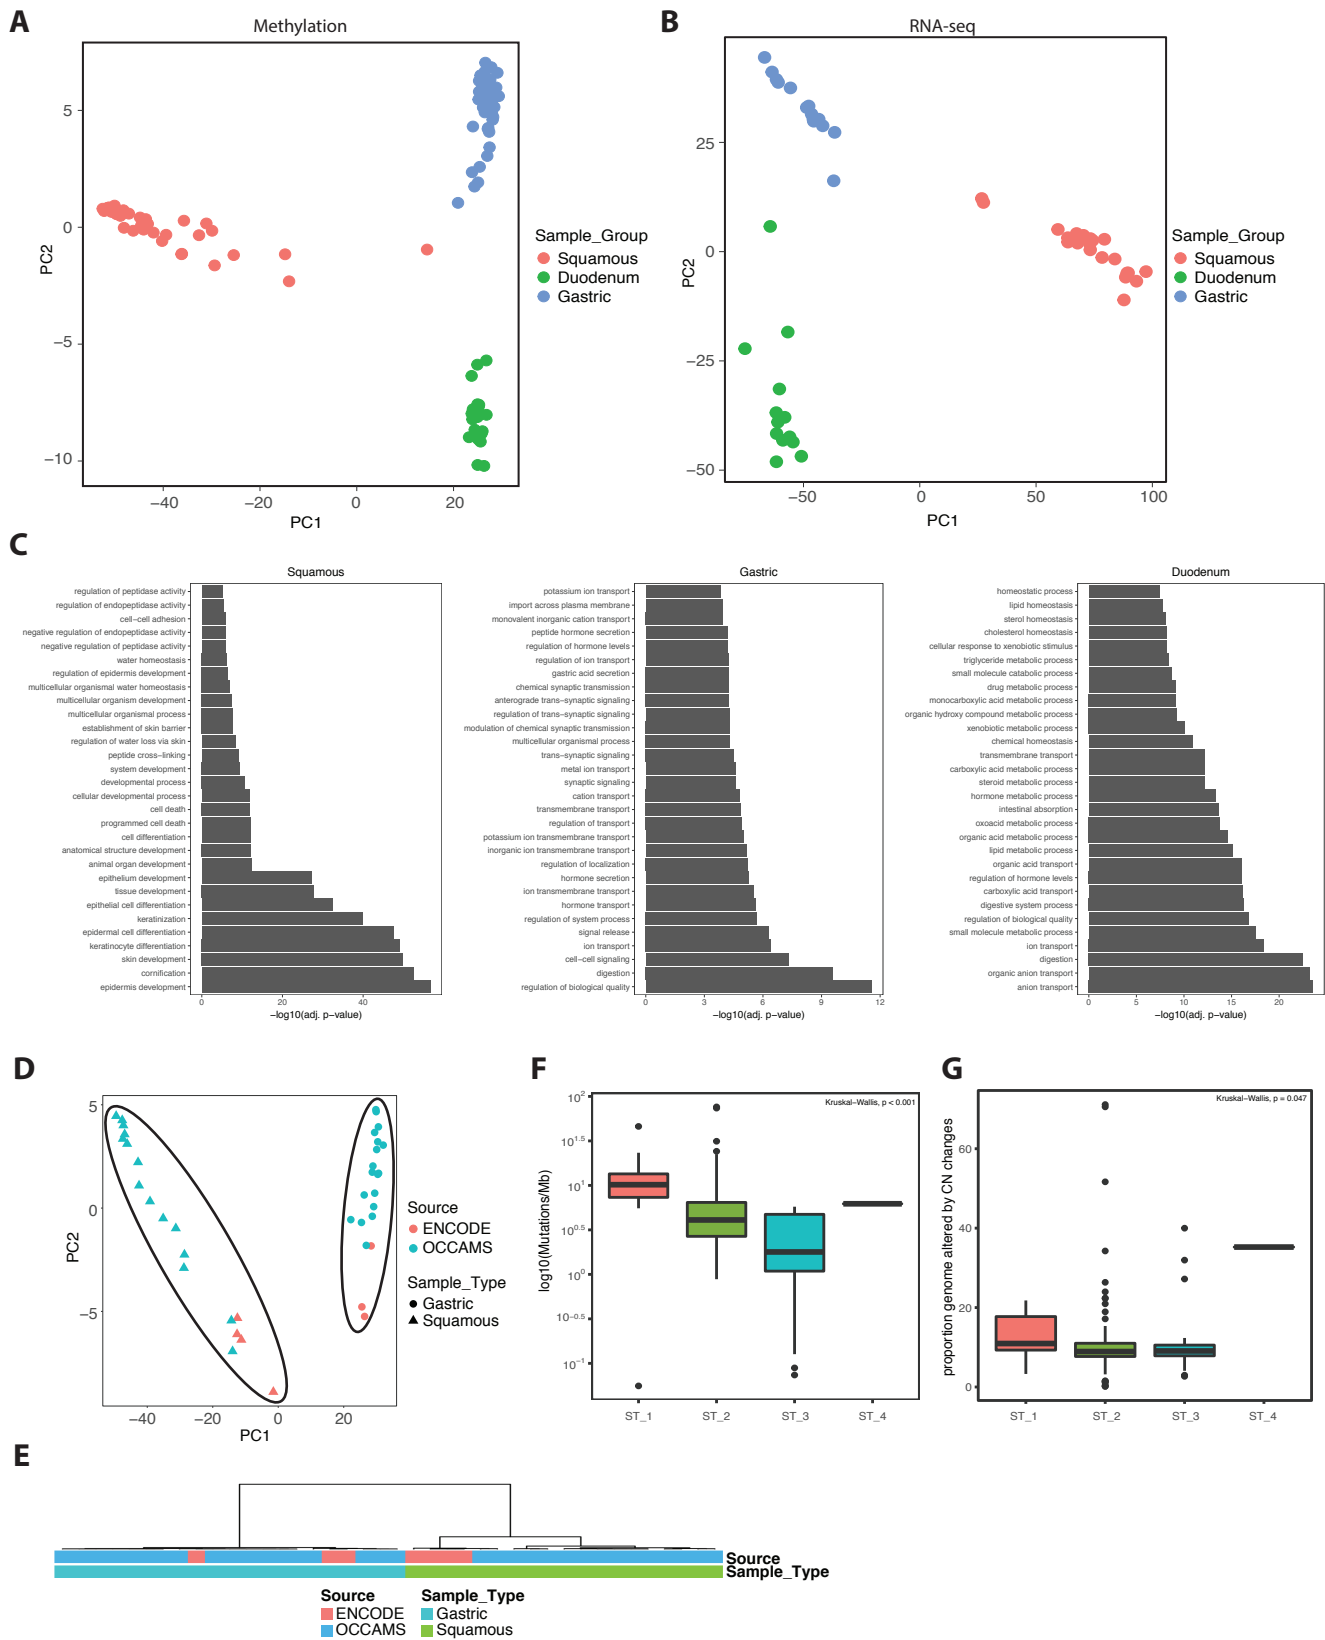

Supplement: EMS86517-supplement-Supplementary_Figures.pdf [file EMS86517-supplement-Supplementary_Figures.pdf]
